# Supplementary material
Source: Springer Nature journal article supplement (https://www.springermedizin.de/resource/supplementary/12913_2007_670_MOESM1_ESM.pdf/9535278)

## Public facilities:

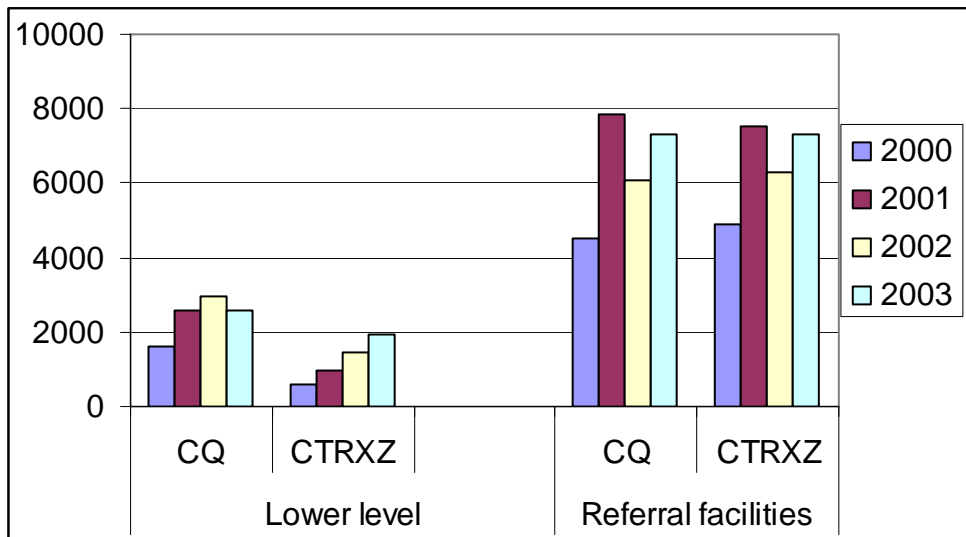

## Private Not for profit facilities:

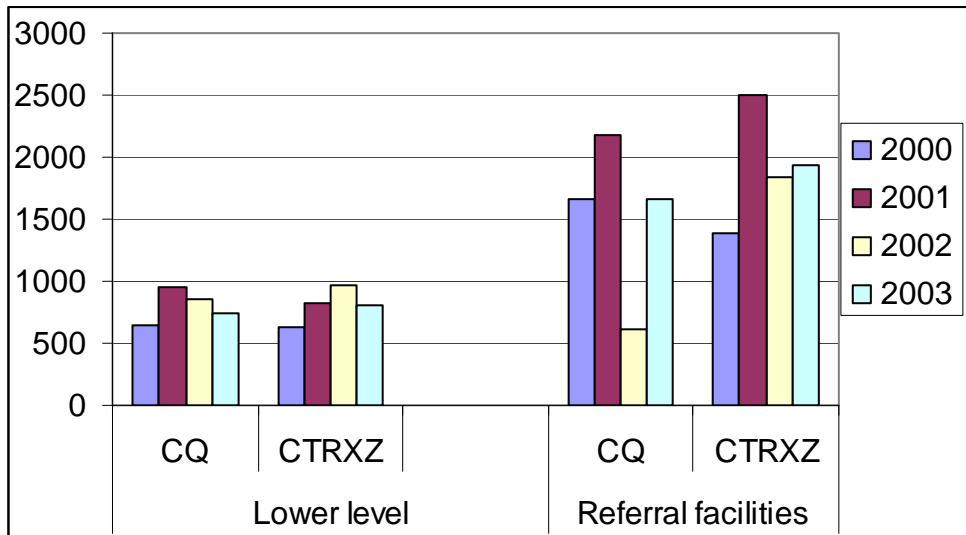

Supplement: MOESM1 [file 9535278]
